# Supplementary material for: Unprecedented pentadenticity of the HB(3-Phpz)3 (= TpPh) ligand
Source: Royal Society of Chemistry journal article supplement (doi:10.1039/a908478i), 2000-01-01
Supplement: a908478i.doc [file a908478i.doc]

# Unprecedented pentadenticity of the

**HB(3-Phpz)3 (= TpPh) ligand**

###### Supplementary information

### Christian Slugovc,* Ernesto Carmona

IIQ-*Departamento de Química Inorgánica*

#### CSIC - Universidad de Sevilla

#### Avda. Américo Vespucio s/n - Isla de la Cartuja

*41092 Sevilla, Spain*

*E-mail: slugi@mail.zserv.tuwien.ac.at*

##### Kurt Mereiter

*Institute of Mineralogy, Crystallography and Structural Chemistry,*

*Vienna University of Technology, Getreidemarkt 9, A-1060 Vienna, Austria*

##### Swiatoslaw Trofimenko

*Department of Chemistry and Biochemistry*

#### University of Delaware, Newark, Delaware 19716-2522, USA

# Experimental

All preparations and manipulations were carried out under oxygen-free nitrogen or argon following conventional Schlenk techniques. Solvents were dried rigorously and degassed before use. Light petroleum (PE), b.p. 40-60 °C, was used. The complex [IrCl(coe)2]2[[1]](#endnote-2)and TlTpPh[[2]](#endnote-3) were prepared according to literature procedures. Microanalysis were made by the Microanalytical Service of the Instituto de Investigaciones Químicas (Sevilla). Infrared spectra were recorded on a Bruker Vector 22 spectrometer, NMR spectra on Bruker AMX-300, AMX-400 and AMX 500 spectrometers. The 1H and 13C resonances of the solvent were used as internal standards, but chemical shifts are reported with respect to TMS. 11B NMR shifts were referenced to BF3.Et2O. Most of the NMR assignments are based on extensive 1H-1H decoupling experiments, NOE-DIFF measurements and homo- and heteronuclear two-dimensional spectra. q means quaternary carbon, m means metalated carbon or proton of the metalated phenyl substituent and *b* means broadened signal, and finally *v* means virtual multiplicity. The given temperature for heating experiments, always was measured in the oil-bath.

**(*OC*-6-25)-Ir(*4*(*N*,*N´*,*N´´*,*CPh*)-TpPh)(ethyl)(*2*-ethene)** (**1**): Through a suspension of [(IrCl(coe)2)2] (433 mg, 0.483 mmol) in CH2Cl2 (15 mL) ethene was bubbled at -35 °C for 5 min to give a colorless solution, whereupon a solution of TlTpPh (624 mg, 0.966 mmol) in CH2Cl2 (15 mL) was added. Stirring the reaction mixture for 4 h, allowing a gradual warming from -35 °C to room temperature resulted in the precipitation of TlCl (starting at -20°C). The reaction mixture was transferred via a canula to separate part of the precipitate and was then centrifuged. The clear solution was again evaporated to dryness and the residue treated with 7 mL PE. Upon cooling at -20 °C, a pale yellow precipitate formed, which was collected on a glass frit and washed two times with 2 mL PE each. Drying the residue under vacuum gave analytically pure **1**. Yield: 570 mg (86 %).

Anal. calcd. for: C31H30BIrN6 (MW: 689.84): C, 54.0; H, 4.4; N, 12.2. Found: C, 54.0; H, 4.5; N, 12.3. 1H NMR (, 300 MHz, benzene-d6, 20 °C): 7.62 (d, 1H, *3JHH* = 2.3 Hz, Hpz5), 7.51 (d, 1H, *3JHH* = 2.5 Hz, Hpzr5), 7.43 (m, 1H, Phm), 7.35 (d, 1H, *3JHH* = 2.3 Hz, Hpz5), 7.15-6.90 (m, 12H, Ph), 6.34 (m, 1H, Phm), 6.14 (d, 1H, *3JHH* = 2.5 Hz, Hpz4), 5.94 (d, 1H, *3JHH* = 2.3 Hz, Hpz4), 5.92 (d, 1H, *3JHH* = 2.3 Hz, Hpz4), 3.40 (m, 2H, H2C=CH2), 2.80 (m, 2H, H2C=CH2), 2.05 (bq, 2H, *3JHH* = 7.4 Hz, C*H2*CH3), 0.25 (t, 3H, *3JHH* = 7.4 Hz, CH2C*H3*). 13C1H} NMR (, 75.5 MHz, benzene-d6, 20 °C): 161.6, 156.6, 156.3 (3C, Cpz3), 141.6, 140.3 (2C, Phq), 136.8, 136.2, 135.9 (3C, Cpzr5), 134.1, 134.0 (2C, Phq,m), 130.4 (1C, Phm), 129.8, 129.3, 128.4, 127.9, 127.8, 127.5, 126.2 (11C, Ph), 122.2, 121.9 (2C, Phm), 108.4, 106.3, 102.1 (3C, Cpz4), 60.2 (2C, H2*C*=*C*H2), 15.9 (1C, CH2*C*H3), -4.7 (1C, *C*H2CH3). 11B1H} NMR (, 96.3 MHz, CDCl3, 20 °C): -2.6. IR (Nujol, cm-1): 2473 (m, BH).

A byproduct (< 4%) also forms, as seen by integration of the 1H-NMR spectrum of the crude reaction mixture. It was not isolated but it is suspected to be the second diastereomer (*OC*-6-35); observable 1H-NMR data (, CDCl3, 20 °C): 3.50 (m, 2H, H2C=CH2), 2.38 (m, 2H, H2C=CH2), 0.05 (t, 3H, *3JHH* = 7.3 Hz, CH2C*H3*).

**(*OC*-6-24)-Ir(*5*(*N*,*N´*,*N´´*,*CPh*,*CPh´*)-TpPh)(*2*-ethene)** (**2**). A solution of **1** (60 mg, 0.087 mmol) in benzene (4 mL) was heated at 80°C for 17 h or in toluene (4 mL) at 115°C for 4 h 30 min. The solvent was evaporated to dryness and the crude reaction mixture was purified via column chromatography (Al2O3, eluents PE : Et2O = 1:1). **2** was obtained by sampling the yellow band by removing the solvent and drying in vacuum. Yield: 53 mg (92 %).

Anal. calcd. for: C29H24BIrN6 (MW: 659.59): C, 52.8; H, 3.7; N, 12.7. Found: C, 52.4; H, 3.8; N, 12.4. 1H NMR (, 300 MHz, CDCl3, 20 °C): 8.15 (d, *3JHH* = 2.5 Hz, 1H,Hpz5), 7.90 (d, *3JHH* = 7.8 Hz, 1H, Ph), 7.79 (d, *3JHH* = 2.3 Hz, 1H,Hpz5), 7.61 (d, *3JHH* = 2.6 Hz, 1H,Hpz5), 7.55 (dd, *3JHH* = 7.3 Hz, *4JHH* = 1.5 Hz, 1H, Ph), 7.47-7.37 (m, 3H, Ph), 7.31-7.23 (m, 3H, Ph), 6.89 (bd, *3JHH* = 7.2 Hz, 2H,Ph), 6.83 (d, *3JHH* = 7.1 Hz, 2H, Ph), 6.75 (dd, *3JHH* = 7.3 Hz, *4JHH* = 1.5 Hz, 1H, Ph), 6.70 (d, *3JHH* = 2.5 Hz, 1H,Hpz4), 6.42 (d, *3JHH* = 2.6 Hz, 1H,Hpz4), 6.17 (d, *3JHH* = 2.3 Hz, 1H, Hpz4), 3.15 (m, 2H, H2C=CH2), 2.74 (m, 2H, H2C=CH2). 13C1H} NMR (, 75.5 MHz, CDCl3, 20 °C): 164.0, 161.3, 154.8, (3C, Cpz3), 144.5, (1C, Phq), 140.5 (1C, Cpz5), 140.1, 139.6 (2C, Phq), 137.8 (1C, Ph), 136.9, 135.8 (2C, Cpz5), 135.4, 132.3 (2C, Phq.m), 129.7, 128.74, 128.70, 128.68, 128.65, 128.59, 128.3, 127.0 (8C, Ph), 123.2, 122.9, 122.7, 122.5 (4C, Phm), 106.3, 105.1, 103.2 (3C, Cpz4), 60.6 (2C, H2*C*=*C*H2). 11B1H} NMR (, 96.3 MHz, CDCl3, 20 °C): -2.4. IR (Nujol, cm-1): 2482 (m, BH).

**(*OC*-6-43)-Ir(*5*(*N*,*N´*,*N´´*,*CPh*,*CPh´*)-TpPh)(*1*(*N1*)-3-phenylpyrazole)** (**3**). To a suspension of [(IrCl(coe)2)2] (180 mg, 0.201 mmol) in CH2Cl2 (6 mL) 2,3-dimethylbutadiene (0.3 mL, excess) was added at room temperature to give a colorless solution, whereupon a solution of TlTpPh (260 mg, 0.403 mmol) in CH2Cl2 (6 mL) was added. Stirring the reaction mixture for 4 h, at room temperature resulted in the precipitation of TlCl. The reaction mixture was transferred via a canula to separate part of the precipitate and was then centrifuged. The deep red clear solution was evaporated to dryness. **3** was obtained using column chromatography (neutral aluminium oxide 90 active, eluents PE : Et2O = 1:1 sampling the band at Rf (PE : Et2O = 4:1) = 0.20), by removing the solvent and drying in vacuum. Yield: 55 mg (19 %).

Anal. calcd. for: C36H28BIrN8 (MW: 775.71): C, 55.7; H, 3.6; N, 14.5. Found: C, 55.8; H, 3.8; N, 14.6. 1H NMR (, 300 MHz, CDCl3, 20 °C): 9.72 (bs, 1H, N-H), 8.02 (d, *3JHH* = 2.5 Hz, 1H,Hpz5), 7.81 (d, *3JHH* = 2.3 Hz, 1H,Hpz5), 7.63 (d, *3JHH* = 7.4 Hz, 1H, Ph), 7.52-7.31 (m, 7H, Hpz5, Ph), 7.17-6.99 (m, 9H, Ph), 6.90 (vt, *3JHH* = 2.3 Hz, 1H,Hpz5+), 6.86-6.70 (m, 2H, Ph), 6.59 (d, *3JHH* = 2.5 Hz, 1H,Hpz4), 6.31 (d, *3JHH* = 2.5 Hz, 1H,Hpzr4), 6.23 (d, *3JHH* = 2.3 Hz, 1H, Hpz4), 5.93 (vt, *3JHH* = 2.3 Hz, 1H,Hpz4+). 13C1H} NMR (, 75.5 MHz, CDCl3, 20 °C): 166.0, 163.2, 154.7, 151.3 (4C, Cpz3), 143.6, (1C, Phq), 143.5 (1C, Cpz5), 142.8 (1C, Phq), 141.5 (1C, Phq), 140.8 (1C, Phq), 140.4 (1C, Cpz5+), 137.1, 137.0, 136.7, 136.3 (6C, Ph, Cpz5), 133.2 (1C, Phq,m), 129.5, 129.40, 129.38 (3C, Ph), 129.32 (1C, Phq,m), 128.34, 128.26, 127.5, 127.4, 125.7 (6C, Ph), 122.9, 122.5, 122.4, 121.5 (4C, Phm), 106.1, 105.9, 103.6 (3C, Cpz4), 103.0 (1C, Cpz4+). 11B1H} NMR (, 96.3 MHz, CDCl3, 20 °C): -2.5. IR (Nujol, cm-1): 3361 (m, NH), 2474 (m, BH).

**Ir(*4*(*N*,*N´*,*N´´*,*CPh*)-TpPh)H(1-oxocyclopent-2-ylidene)** (**4**). A solution of **1** (92 mg, 0.133 mmol) in THF (4 mL) was heated at 80°C for 7h. The solution was evaporated to dryness. The resulted yellow oil was precipitated upon treatment with PE (2 mL). The precipitate was collected on a glass frit and dried in vacuum. Yield: 85 mg (91 %).

Anal. calcd. for: C31H28BIrN6O (MW: 703.64): C, 52.9; H, 4.0; N, 11.9. Found: C, 52.7; H, 3.9; N, 12.2. 1H NMR (, 300 MHz, CDCl3, 20 °C): 7.89 (d, *3JHH* = 2.3 Hz, 1H,Hpz5), 7.82 (d, *3JHH* = 2.3 Hz, 1H,Hpz5), 7.69 (d, *3JHH* = 7.6 Hz, 1H, Phm), 7.61-7.53 (m, 4H, Ph, PhmHpz5), 7.28-7.10 (m, 9H, Ph), 7.01 (vt, *3JHH* = 7.2 Hz, 1H, Phm), 6.51 (d, *3JHH* = 2.3 Hz, 1H,Hpz4), 6.28 (d, *3JHH* = 2.3 Hz, 1H,Hpz4), 6.15 (d, *3JHH* = 2.3 Hz, 1H,Hpz4), 3.92 (m, 1H, H5), 3.61 (m, 1H, H5), 1.84 (m, 1H, H3), 1.36 (m, 1H, H3), 0.60-0.51 (m, 2H, H4), -20.78 (s, 1H, Ir-*H*). 13C1H} NMR (, 75.5 MHz, CDCl3, 20 °C): 267.7 (1C, Ir=*C*), 163.2, 154.6 153.7 (3C, Cpz3), 142.2, 141.4 (2C, Phq), 138.0 (1C, Phm), 137.8, 137.1, 136.1 (3C, Cpz5), 134.3, 134.26 (2C, Phq,m), 129.8, 129.3, 128.02, 128.00, 127.8, 127.7, 126.7 (11C, Ph), 122.7, 121.5 (2C, Phm), 106.9, 104.8, 103.0 (3C, Cpz4), 81.0 (1C, C5), 56.4 (1C, C3), 21.2 (1C, C4). 11B1H} NMR (, 96.3 MHz, CDCl3, 20 °C): -3.3. IR (Nujol, cm-1): 2475 (m, BH), 2230 (m, IrH).

ORTEP plots of **1** (hydrogen atoms omitted for clarity; thermal ellipsoids are at the 20 % probability level). Selected bond length (Å) and angles (°): Ir-N(1) 2.014(4), Ir-N(3) 2.216(4), Ir-N(5) 2.289(3), Ir-C(9) 2.030(4), Ir-C(28) 2.159(4), Ir-C(29) 2.177(4), Ir-C(30) 2.137(4), C(28)-C(29) 1.379(6), C(30)-C(31) 1.494(7), N(1)-Ir-N(3) 92.8(2), N(3)-Ir-N(5) 83.3(1), C(30)-Ir-N(3) 88.3(2), C(9)-Ir-N(3) 170.3(2), C(28)-Ir-N(3) 94.8(2), C(29)-Ir-N(3) 95.7(2), C(29)-C(28)-Ir 72.1(2), C(31)-C(30)-Ir 115.7(4).

1. Herde, J. L.; Lambert, J. C.; Senoff, C. V. Inorg. Synth. **1970**, *12*, 99. [↑](#endnote-ref-2)
2. Trofimenko, S.; Calabrese, J. C.; Thompson, J. S. *Inorg. Chem.* **1987**, *26*, 1508. [↑](#endnote-ref-3)
